# Supplementary material for: Maternal DNA lineages at the gate of Europe in the 10th century AD
Source: PLoS One. 2018 Mar 14;13(3):e0193578. doi: 10.1371/journal.pone.0193578 (PMC5851556; doi:10.1371/journal.pone.0193578)
Supplement: S1 Table — (XLSX) [file pone.0193578.s005.xlsx]

## Sheet: S1
S1 Table. Information regarding the osteological and pathological analysis of the samples.
Burial no. (Sample ID)	Age at death (in years)	Sex	Height (in cm)*	Dental pathology	Skeletal pathology
M1	38-48	Female	158.29 (39.3)	CL, DA	Healed fracture on the humerus
M2	9-12	Indeterminate		DA, LEH
M3	39.2-56	Female	163.14 (43)	AMTL, DA, LEH	PH, OA, PER
M4	33-43	Male		LEH	PH, OA, PER
M5	9-10	Indeterminate		LEH
M6	38-40 prenatal weeks	Indeterminate
M8	16-24	Female	158.02 (39.1)	CL	PER, healed rib fracture, healed cranial lesion
M9	2.6-4	Indeterminate
M11	5-8	Indeterminate		CL, LEH
M15	4-6	Indeterminate			PER
M17	24-34	Male	161.91 (41.1)	CL, DA, LEH	PH
* In brackets femoral length used for calculating stature using the formulae from Bach (1965) and Breitinger (1937) [1].
Abbreviations:
	CL – carious lesion; DA – dental abscess;
	LEH – linear enamel hypoplasia; PH – porotic hyperostosis;
	OA – osteoarthritis; PER – periosteal inflammation.
References:
1. Vercellotti G, Agnew AM, Justus HM, Sciulli PW. Stature estimation in an early medieval (XI-XII c.) Polish population: testing the accuracy of regression equations in a bioarcheological sample. Am J Phys Anthropol. 2009; 140(1): 135-142. doi: 10.1002/ajpa.21055. PMID: 19373843.
