# Supplementary material for: Maternal DNA lineages at the gate of Europe in the 10th century AD
Source: PLoS One. 2018 Mar 14;13(3):e0193578. doi: 10.1371/journal.pone.0193578 (PMC5851556; doi:10.1371/journal.pone.0193578)
Supplement: S8 Table — (XLSX) [file pone.0193578.s012.xlsx]

## Sheet: S8
S8 Table. Population information and mtDNA haplogroup frequencies used for PCA with the medieval population from Romania and 35 modern-day Eurasian populations.
Region	Country	Population	N	Abbreviation	Mitochondrial haplogoup frequencies																																				References
			15376		A	B	C	D	F	G	H	HV	HV0	I	J	K	L	M	N	N9	R	T	T1	T2	U	U1	U2	U3	U4	U5a	U5b	U6	U7	U8	V	W	X	Y	Z	Other
Eastern Europe	Romania	Medieval population	8	ROU-med	0	0	0	0	0	0	37.5	0	0	0	0	0	0	0	0	12.5	12.5	0	0	0	0	0	0	12.5	0	12.5	0	0	0	0	12.5	0	0	0	0	0	This study
Eastern Europe	Belarus	Belorussians	260	BLR	0	0	0.769231	0	0.384615	1.15385	38.4615	1.15385	1.15385	1.53846	10.3846	2.30769	0	0	1.92308	0	1.15385	0.384615	1.92308	5.38462	0.769231	0	3.07692	2.69231	4.23077	7.69231	1.53846	0	1.53846	1.15385	4.61538	4.61538	0	0	0	0	Kushniarevich et al. 2015 (260)
Eastern Europe	Bulgaria	Bulgarians	850	BGR	0	0	0.235294	0.352941	0	0	42	3.88235	2.23529	1.17647	7.88235	5.76471	0.352941	0.235294	1.76471	0	0.823529	0	4.35294	6.23529	0	1.41176	1.41176	1.88235	3.88235	4.35294	2.35294	0	0.470588	0.470588	1.52941	2.70588	2.11765	0	0.117647	0	Karachanak et al. 2012 (850)
Eastern Europe	Czechia	Czechs	358	CZE	0.27933	0	0	0.27933	0	0	44.4134	1.67598	1.11732	1.95531	11.7318	4.46927	0	1.11732	0.837989	0.27933	0.27933	0.837989	2.51397	9.49721	0	0	1.95531	1.67598	3.07263	5.02793	3.07263	0	0.27933	0.558659	1.39665	0.27933	1.39665	0	0	0	Kushniarevich et al. 2015 (94); Malyarchuk et al. 2006 (179); Mielnik-Sikorska et al. 2013 (85)
Eastern Europe	Hungary	Hungarians	211	HUN	0	0	0	0.947867	0	0	40.2844	0.473934	2.36967	2.8436	9.95261	4.73934	0.473934	0.947867	0.947867	0	0.473934	0.947867	2.36967	10.9005	0	0.473934	1.4218	0.947867	2.8436	3.79147	3.79147	0.947867	0.473934	0.473934	1.4218	2.36967	1.89573	0	0	0.473934	Irwin et al. 2007 (211)
Eastern Europe	Poland	Poles	403	POL	0.248139	0	0.248139	0.248139	0	0.248139	39.9504	0.744417	0.248139	1.73697	10.9181	3.72208	0.744417	0	1.24069	0	0	1.73697	2.23325	6.69975	0	0.992556	0.744417	1.48883	3.97022	8.18859	5.21092	0	0.248139	0.744417	3.22581	2.48139	1.24069	0	0	0.496278	Mielnik-Sikorska et al. 2013 (403)
Eastern Europe	Romania (Dobrudja)	Romanians from Dobrudja	105	ROU-D	0	0	0	1.90476	0	0	40	5.71429	1.90476	0	11.4286	8.57143	0.952381	0.952381	0.952381	0	6.66667	0	2.85714	2.85714	0	0.952381	0.952381	0	0	3.80952	1.90476	0	0	1.90476	0	2.85714	1.90476	0	0	0.952381	Bosch et al. 2006 (59); Cocoș et al. 2017 (46)
Eastern Europe	Romania (Moldavia)	Romanians from Moldavia	235	ROU-M	0.425532	0	0.425532	0	0	0	37.4468	2.55319	2.55319	1.2766	8.51064	5.53191	0	2.55319	4.68085	0	0.425532	2.97872	2.12766	4.68085	0	0.851064	0.425532	2.12766	6.80851	2.97872	3.82979	0	0.425532	0	1.2766	2.55319	1.2766	0.851064	0	0.425532	Cocoș et al. 2017 (235)
Eastern Europe	Romania (Transylvania)	Romanians, Csángó, Szekler from Transylvania	567	ROU-T	1.23457	0.176367	1.94004	0.352734	0	0.176367	34.0388	0.705467	3.1746	1.0582	10.9347	11.2875	0	0	2.1164	0	2.1164	0.176367	2.29277	5.29101	0	0.529101	1.41093	0.176367	2.1164	3.1746	4.2328	0.176367	0.176367	2.29277	1.23457	4.93827	2.29277	0.176367	0	0	Brandstätter et al. 2007a (360); Cocoș et al. 2017 (207)
Eastern Europe	Romania (Wallachia)	Romanians from Wallachia	272	ROU-W	0	0	0	0	0	0	41.1765	2.57353	2.94118	0.735294	10.2941	4.04412	0.735294	2.20588	3.67647	0	0.735294	0.367647	3.67647	4.41176	0	2.94118	1.10294	2.20588	2.57353	3.30882	3.30882	0	0	0.367647	1.47059	4.04412	1.10294	0	0	0	Bosch et al. 2006 (46); Cocoș et al. 2017 (226)
Eastern Europe	Russian Federation	Russians	843	RUS	0.118624	0	0.59312	1.18624	0	0.118624	43.535	1.18624	0.355872	1.66074	8.4223	4.74496	0.237248	0.474496	1.06762	0	1.77936	0.830368	3.32147	5.69395	0.59312	0.355872	2.13523	1.42349	4.03321	6.88019	2.25386	0	0.355872	0.59312	2.84698	2.01661	1.06762	0	0.118624	0	Kushniarevich et al. 2015 (518); Malyarchuk et al. 2004 (325)
Eastern Europe	Slovakia	Slovaks	580	SVK	0.344828	0.172414	0.689655	0	0	0	43.2759	1.89655	1.37931	2.93103	8.62069	3.7931	0.344828	1.72414	0.689655	0	0	0.517241	1.2069	7.75862	0	0.517241	0.689655	0.862069	5.51724	5.34483	5.86207	0	0.172414	0.517241	1.89655	2.06897	1.2069	0	0	0	Lehocký et al. 2008 (374); Malyarchuk et al. 2008 (206)
Eastern Europe	Ukraine	Ukranians	765	UKR	0.392157	0	0.784314	0.130719	0	0.261438	38.4314	3.13725	0.915033	2.87582	8.10458	4.96732	0.130719	0.130719	0.915033	0.130719	0.261438	9.54248	0.392157	1.30719	0.130719	0	1.56863	1.04575	5.4902	6.53595	3.79085	0	0	0.261438	4.18301	2.7451	1.30719	0	0	0.130719	Mielnik-Sikorska et al. 2013 (158); Pshenichnov et al. 2013 (607)
Southern Europe	Bosnia and Herzegovina	Bosnians, Herzegovinians	513	BIH	0	0	0	0.389864	0	0	44.2495	4.67836	2.14425	2.14425	7.60234	6.62768	0.194932	0.194932	0.779727	0	1.55945	0.194932	1.16959	3.11891	0	0.974659	0.974659	0.584795	4.67836	4.87329	3.7037	0.194932	0.779727	0.194932	3.50877	2.72904	1.55945	0	0.194932	0	Malyarchuk et al. 2003 (144); Šarac et al. 2014 (369)
Southern Europe	Croatia	Croatians	488	HRV	0	0	0	0	0.204918	0	45.2869	3.07377	1.43443	2.66393	9.83607	4.5082	0.204918	0	0.819672	0	0	0	1.43443	4.71311	0.204918	1.22951	2.66393	1.63934	2.66393	5.32787	3.68852	0.204918	0.409836	0.409836	3.89344	1.84426	1.63934	0	0	0	Šarac et al. 2014 (488)
Southern Europe	Greece	Greeks	319	GRC	0	0	0.31348	0	0	0	42.3197	1.25392	2.82132	2.50784	10.3448	5.01567	0	0.940439	1.25392	0	2.82132	0.626959	4.38871	3.44828	0	1.88088	0.31348	3.76176	4.38871	3.76176	0.940439	0	0.626959	0	0	2.50784	3.76176	0	0	0	Irwin et al. 2008 (319)
Southern Europe	Italy	Italians	1058	ITA	0	0	0	0.378072	0	0	37.6181	5.00945	1.22873	1.32325	7.56144	8.88469	1.32325	0.567108	1.60681	0	1.89036	0.94518	3.11909	8.97921	0	1.0397	1.51229	2.36295	1.70132	2.6465	1.51229	0.47259	0.94518	0.378072	2.36295	2.17391	2.45747	0	0	0	Achilli et al. 2007 (322); Ottoni et al. 2009 (341); Turchi et al. 2008 (395)
Southern Europe	Portugal	Portuguese	538	PRT	0	0	0	0	0	0	44.7955	0.185874	2.7881	1.85874	7.24907	5.94796	5.76208	0.929368	0.743494	0	1.67286	0.557621	3.15985	6.69145	0	0	0.743494	1.30112	1.48699	2.60223	3.5316	1.30112	0	0	2.04461	2.7881	1.85874	0	0	0	Gonzalez et al. 2003 (298); Prieto et al. 2011 (240)
Southern Europe	Slovenia	Slovenians	201	SVN	0	0	0	0	0	0	42.2886	0	1.49254	0.995025	11.9403	4.47761	0	0	0	0	0	0	2.48756	7.46269	0	0.497512	1.99005	1.49254	4.47761	6.96517	4.97512	0	0	0.497512	3.9801	2.98507	0.995025	0	0	0	Malyarchuk et al. 2003 (104); Šarac et al. 2014 (97)
Southern Europe	Spain	Spaniards	592	ESP	0.168919	0.168919	0.168919	0	0	0	42.3986	0.168919	1.35135	1.18243	7.77027	5.91216	2.87162	0.675676	0.506757	0.168919	1.35135	2.36486	2.36486	3.71622	0.506757	0.168919	1.35135	2.02703	1.85811	5.74324	4.05405	1.52027	0	0.337838	3.71622	1.85811	3.37838	0.168919	0	0	Alvarez et al. 2007 (307); Prieto et al. 2011 (285)
Northern Europe	Denmark	Danish	201	DNK	0	0	0	0	0	0	44.2786	0.497512	2.98507	2.48756	12.4378	9.95025	0.497512	0	0.995025	0	1.49254	1.49254	1.49254	5.47264	0	0	3.48259	0.497512	2.98507	3.9801	1.99005	0.497512	0	0.995025	0	0.497512	0.995025	0	0	0	Mikkelsen et al. 2010 (201)
Northern Europe	Estonia	Estonians	117	EST	0	0	0	0	0	0	43.5897	0	0	1.7094	12.8205	0.854701	0.854701	0	0	0	0	2.5641	2.5641	8.54701	0	0	2.5641	0.854701	4.2735	9.40171	4.2735	0	0	0	1.7094	2.5641	0.854701	0	0	0	Lappalainen et al. 2008 (117)
Northern Europe	Finland	Finns	602	FIN	0	0	0	0	0	0	41.0299	0	1.49502	2.99003	4.48505	4.15282	0	0	0.498339	0	0.498339	0	1.66113	1.66113	0	0	0.498339	0	0.830565	6.97674	18.6047	0	0.498339	0.498339	3.65449	6.97674	1.49502	0	1.49502	0	Hedman et al. 2007 (200); Meinilä et al. 2001 (402)
Northern Europe	Latvia	Latvians	413	LVA	0	0	0	0	0	0.484262	43.3414	1.69492	0	4.60048	6.05327	2.42131	0	0	0	0	0.242131	0.484262	1.69492	7.02179	0.242131	0	3.63196	2.17918	9.20097	7.74818	2.17918	0	0	0	2.66344	3.87409	0.242131	0	0	0	Pliss et al. 2006 (299); Lappalainen et al. 2008 (114)
Northern Europe	Lithuania	Lithunians	343	LTU	0.291545	1.16618	0	0	0.58309	0	45.7726	1.45773	1.74927	3.207	6.41399	2.04082	0.58309	0.58309	1.74927	0	1.74927	0.291545	3.207	6.70554	0.874636	0	0	1.16618	2.91545	6.70554	3.49854	0	0	0.58309	4.08163	2.04082	0.58309	0	0	0	Kasperavičiūtė et al. 2004 (180); Lappalainen et al. 2008 (163)
Northern Europe	Sweden	Swedes	603	SWE	0	0.497512	0.331675	0	0.66335	0.331675	47.4295	0.331675	2.48756	2.98507	7.9602	7.13101	0.66335	0.165837	0	0	0.165837	0.829187	2.48756	5.63847	0.331675	0.497512	0.829187	0.66335	2.81924	5.63847	4.80929	0	0.331675	0.331675	0.66335	1.3267	1.3267	0	0.331675	0	Lappalainen et al. 2008 (307); Tillmar et al. 2010 (296)
Western Europe	Austria	Austrians	273	AUT	0	0	0.3663	0	0	0	43.5897	0.3663	2.1978	0.732601	8.42491	8.42491	0	0	0.732601	0	0	1.4652	4.7619	6.95971	0	0.732601	2.1978	1.0989	5.49451	5.86081	3.663	0	0	0	0	1.4652	1.4652	0	0	0	Brandstätter et al. 2007b (273)
Western Europe	France	French	868	FRA	0.115207	0.230415	0	0	0.115207	0	45.3917	2.41935	1.38249	1.95853	8.75576	8.29493	0.921659	0.115207	1.15207	0	1.03687	1.6129	1.72811	4.03226	0.691244	0.115207	1.38249	1.38249	2.76498	4.03226	3.80184	0	0	0.230415	3.57143	1.95853	0.806452	0	0	0	Richard et al. 2007 (868)
Western Europe	Germany	Germans	399	DEU	0	0	0.250627	0	0	0	46.6165	0.501253	0.501253	3.7594	11.0276	5.51378	0	0.250627	0.501253	0	1.00251	0.501253	1.75439	7.76942	0.250627	0	1.00251	1.50376	2.25564	5.01253	1.75439	0	0.250627	0	4.26065	1.25313	2.25564	0	0	0.250627	Brandstätter et al. 2006 (100); Poetsch et al. 2003 (299)
Central Asia	Kazakhstan	Kazakhs	256	KAZ	8.20312	2.34375	7.8125	17.9688	4.29688	8.20312	14.0625	1.95312	1.17188	0.78125	3.125	2.34375	0	3.125	0.78125	1.5625	1.95312	0	1.17188	3.90625	0	0.78125	3.51562	0	2.34375	3.125	1.5625	0	0.78125	0.390625	0	1.17188	0.390625	0	1.17188	0	Irwin et al. 2010 (256)
Central Asia	Kyrgyzstan	Kyrgyzs	249	KGZ	5.62249	8.43373	12.8514	21.2851	2.40964	6.4257	8.03213	1.20482	0	1.20482	2.81124	0.803213	0	8.03213	0.401606	1.60643	0.803213	0	2.00803	0.401606	0	0	0.803213	0.803213	4.01606	2.00803	1.60643	0	0.401606	0.401606	0	1.60643	0.401606	2.40964	1.20482	0	Irwin et al. 2010 (249)
Central Asia	Uzbekistan	Uzbeks	328	UZB	3.96341	1.52439	8.53659	11.5854	2.7439	3.35366	18.5976	1.21951	0.914634	2.7439	3.65854	3.35366	0.609756	7.0122	2.13415	0.609756	3.96341	0.304878	1.82927	4.87805	0	0.914634	2.7439	1.21951	1.52439	1.52439	2.43902	0	1.52439	0	0	1.82927	1.82927	0.304878	0.609756	0	Irwin et al. 2010 (328)
Southern Asia	Iran (Islamic Republic of)	Iranians, Gilaki, Lur, Mazandarian	511	IRN	0.587084	0.782779	0.391389	1.17417	0	0.391389	18.3953	7.63209	0.195695	1.76125	14.09	6.26223	0.391389	2.93542	4.50098	0	4.50098	1.76125	3.5225	3.5225	0.391389	2.73973	1.17417	3.13112	0.978474	2.34834	0.391389	0.195695	9.00196	0.978474	0.391389	2.54403	2.73973	0	0.195695	0	Metspalu et al. 2004 (436); Quintana-Murci et al. 2004 (75)
Southern Asia	Pakistan	Hunza Burusho, Pakistani, Parsi, Sindhi, Pathan, Baluch, Brahui, Makrani	551	PAK	0.181488	0.362976	0.544465	1.27042	0.181488	0.181488	10.8893	7.98548	0.181488	1.63339	3.0853	1.63339	2.90381	31.7604	1.99637	0	6.71506	0.362976	2.72232	1.63339	0.907441	1.27042	7.25953	0.181488	2.17786	0.362976	0.181488	0	7.80399	0	0	2.90381	0.362976	0	0.362976	0	Quintana-Murci et al. 2004 (221); Quintana-Murci et al. 2004 (100); Rakha et al. 2011 (230)
Western Asia	Iraq	Iraqi	222	IRQ	0	0.900901	0	0	0	0	16.6667	12.1622	0	1.35135	13.964	5.40541	7.20721	1.35135	1.8018	0	5.85586	0	4.95495	7.20721	1.35135	2.7027	1.8018	4.5045	3.6036	0.900901	0	0.900901	3.6036	0	0	0.900901	0.900901	0	0	0	Al-Zahery et al. 2003 (52); Al-Zahery et al. 2011 (170)
Western Asia	Turkey	Turks	274	TUR	1.45985	1.09489	2.91971	1.09489	0	1.09489	21.8978	4.0146	0.729927	1.82482	6.93431	5.83942	0.729927	0.364964	3.64964	0	9.85401	1.09489	3.28467	5.47445	0	2.18978	3.28467	6.56934	0.364964	2.55474	1.09489	0	3.64964	0.364964	0	4.37956	2.18978	0	0	0	Quintana-Murci et al. 2004 (50); Serin et al. 2016 (224)
References
Achilli et al. 2007	Achilli A, Olivieri A, Pala M, Metspalu E, Fornarino S, Battaglia V, et al. Mitochondrial DNA variation of modern Tuscans supports the near eastern origin of Etruscans. Am J Hum Genet. 2007; 80(4): 759-68. doi: 10.1086/512822. PMID: 17357081.
Alvarez et al. 2007	Alvarez JC, Johnson DL, Lorente JA, Martinez-Espin E, Martinez-Gonzalez LJ, Allard M, et al. Characterization of human control region sequences for Spanish individuals in a forensic mtDNA data set. Leg Med (Tokyo). 2007; 9(6): 293-304. doi: 10.1016/j.legalmed.2007.05.005. PMID: 17616421.
Al-Zahery et al. 2003	Al-Zahery N, Semino O, Benuzzi G, Magri C, Passarino G, Torroni A, et al. Y-chromosome and mtDNA polymorphisms in Iraq, a crossroad of the early human dispersal and of post-Neolithic migrations. Mol Phylogenet Evol. 2003; 28(3): 458-72. PMID: 12927131.
Al-Zahery et al. 2011	Al-Zahery N, Pala M, Battaglia V, Grugni V, Hamod MA, Hooshiar Kashani B, et al. In search of the genetic footprints of Sumerians: a survey of Y-chromosome and mtDNA variation in the Marsh Arabs of Iraq. BMC Evol Biol. 2011; 11: 288. doi: 10.1186/1471-2148-11-288. PMID: 21970613.
Bosch et al. 2006	Bosch E, Calafell F, Gonzalez-Neira A, Flaiz C, Mateu E, Scheil HG, et al. Paternal and maternal lineages in the Balkans show a homogeneous landscape over linguistic barriers, except for the isolated Aromuns. Ann Hum Genet. 2006; 70(Pt 4): 459-87. doi: 10.1111/j.1469-1809.2005.00251.x. PMID: 16759179.
Brandstätter et al. 2006	Brandstatter A, Klein R, Duftner N, Wiegand P, Parson W. Application of a quasi-median network analysis for the visualization of character conflicts to a population sample of mitochondrial DNA control region sequences from southern Germany (Ulm). Int J Legal Med. 2006; 120(5): 310-4. doi: 10.1007/s00414-006-0114-x. PMID: 16871406.
Brandstätter et al. 2007a	Brandstatter A, Egyed B, Zimmermann B, Duftner N, Padar Z, Parson W. Migration rates and genetic structure of two Hungarian ethnic groups in Transylvania, Romania. Ann Hum Genet. 2007 ;71(Pt 6): 791-803. doi: 10.1111/j.1469-1809.2007.00371.x. PMID: 17532745.
Brandstätter et al. 2007b	Brandstatter A, Niederstatter H, Pavlic M, Grubwieser P, Parson W. Generating population data for the EMPOP database - an overview of the mtDNA sequencing and data evaluation processes considering 273 Austrian control region sequences as example. Forensic Sci Int. 2007; 166(2-3): 164-75. doi: 10.1016/j.forsciint.2006.05.006. PMID: 16829006.
Cocoș et al. 2017	Cocos R, Schipor S, Hervella M, Cianga P, Popescu R, Banescu C, et al. Genetic affinities among the historical provinces of Romania and Central Europe as revealed by an mtDNA analysis. BMC Genet. 2017; 18(1): 20. doi: 10.1186/s12863-017-0487-5. PMID: 28270115.
Gonzalez et al. 2003	Gonzalez AM, Brehm A, Perez JA, Maca-Meyer N, Flores C, Cabrera VM. Mitochondrial DNA affinities at the Atlantic fringe of Europe. Am J Phys Anthropol. 2003; 120(4): 391-404. doi: 10.1002/ajpa.10168. PMID: 12627534.
Hedman et al. 2007	Hedman M, Brandstatter A, Pimenoff V, Sistonen P, Palo JU, Parson W, et al. Finnish mitochondrial DNA HVS-I and HVS-II population data. Forensic Sci Int. 2007; 172(2-3): 171-8. doi: 10.1016/j.forsciint.2006.09.012. PMID: 17336475.
Irwin et al. 2007	Irwin J, Egyed B, Saunier J, Szamosi G, O'Callaghan J, Padar Z, et al. Hungarian mtDNA population databases from Budapest and the Baranya county Roma. Int J Legal Med. 2007; 121(5): 377-83. doi: 10.1007/s00414-006-0128-4. PMID: 17186294.
Irwin et al. 2008	Irwin J, Saunier J, Strouss K, Paintner C, Diegoli T, Sturk K, et al. Mitochondrial control region sequences from northern Greece and Greek Cypriots. Int J Legal Med. 2008; 122(1): 87-9. doi: 10.1007/s00414-007-0173-7. PMID: 17492459.
Irwin et al. 2010	Irwin JA, Ikramov A, Saunier J, Bodner M, Amory S, Rock A, et al. The mtDNA composition of Uzbekistan: a microcosm of Central Asian patterns. Int J Legal Med. 2010; 124(3): 195-204. doi: 10.1007/s00414-009-0406-z. PMID: 20140442.
Karachanak et al. 2012	Karachanak S, Carossa V, Nesheva D, Olivieri A, Pala M, Hooshiar Kashani B, et al. Bulgarians vs the other European populations: a mitochondrial DNA perspective. Int J Legal Med. 2012; 126(4): 497-503. doi: 10.1007/s00414-011-0589-y. PMID: 21674295.
Kasperavičiūtė et al. 2004	Kasperaviciute D, Kucinskas V, Stoneking M. Y chromosome and mitochondrial DNA variation in Lithuanians. Ann Hum Genet. 2004; 68(Pt 5): 438-52. doi: 10.1046/j.1529-8817.2003.00119.x. PMID: 15469421.
Kushniarevich et al. 2015	Kushniarevich A, Utevska O, Chuhryaeva M, Agdzhoyan A, Dibirova K, Uktveryte I, et al. Genetic Heritage of the Balto-Slavic Speaking Populations: A Synthesis of Autosomal, Mitochondrial and Y-Chromosomal Data. PLoS One. 2015; 10(9): e0135820. doi: 10.1371/journal.pone.0135820. PMID: 26332464.
Lappalainen et al. 2008	Lappalainen T, Laitinen V, Salmela E, Andersen P, Huoponen K, Savontaus ML, et al. Migration waves to the Baltic Sea region. Ann Hum Genet. 2008; 72(Pt 3): 337-48. doi: 10.1111/j.1469-1809.2007.00429.x. PMID: 18294359.
Lehocký et al. 2008	Lehocky I, Baldovic M, Kadasi L, Metspalu E. A database of mitochondrial DNA hypervariable regions I and II sequences of individuals from Slovakia. Forensic Sci Int Genet. 2008; 2(4): e53-9. doi: 10.1016/j.fsigen.2007.12.008. PMID: 19083829.
Malyarchuk et al. 2003	Malyarchuk BA, Grzybowski T, Derenko MV, Czarny J, Drobnic K, Miscicka-Sliwka D. Mitochondrial DNA variability in Bosnians and Slovenians. Ann Hum Genet. 2003; 67(Pt 5): 412-25. PMID: 12940915.
Malyarchuk et al. 2004	Malyarchuk B, Derenko M, Grzybowski T, Lunkina A, Czarny J, Rychkov S, et al. Differentiation of mitochondrial DNA and Y chromosomes in Russian populations. Hum Biol. 2004; 76(6): 877-900. PMID: 15974299.
Malyarchuk et al. 2006	Malyarchuk BA, Vanecek T, Perkova MA, Derenko MV, Sip M. Mitochondrial DNA variability in the Czech population, with application to the ethnic history of Slavs. Hum Biol. 2006; 78(6): 681-96. doi: 10.1353/hub.2007.0014. PMID: 17564247.
Malyarchuk et al. 2008	Malyarchuk BA, Perkova MA, Derenko MV, Vanecek T, Lazur J, Gomolcak P. Mitochondrial DNA variability in Slovaks, with application to the Roma origin. Ann Hum Genet. 2008; 72(Pt 2): 228-40. doi: 10.1111/j.1469-1809.2007.00410.x. PMID: 18205894.
Meinilä et al. 2001	Meinila M, Finnila S, Majamaa K. Evidence for mtDNA admixture between the Finns and the Saami. Hum Hered. 2001; 52(3): 160-70. doi: 53372. PMID: 11588400.
Metspalu et al. 2004	Metspalu M, Kivisild T, Metspalu E, Parik J, Hudjashov G, Kaldma K, et al. Most of the extant mtDNA boundaries in south and southwest Asia were likely shaped during the initial settlement of Eurasia by anatomically modern humans. BMC Genet. 2004 ;5: 26. doi: 10.1186/1471-2156-5-26. PMID: 15339343.
Mielnik-Sikorska et al. 2013	Mielnik-Sikorska M, Daca P, Malyarchuk B, Derenko M, Skonieczna K, Perkova M, et al. The history of Slavs inferred from complete mitochondrial genome sequences. PLoS One. 2013; 8(1): e54360. doi: 10.1371/journal.pone.0054360. PMID: 23342138.
Mikkelsen et al. 2010	Mikkelsen M, Sorensen E, Rasmussen EM, Morling N. Mitochondrial DNA HV1 and HV2 variation in Danes. Forensic Sci Int Genet. 2010; 4(4): e87-8. doi: 10.1016/j.fsigen.2009.07.007. PMID: 20457038.
Ottoni et al. 2009	Ottoni C, Martinez-Labarga C, Vitelli L, Scano G, Fabrini E, Contini I, et al. Human mitochondrial DNA variation in Southern Italy. Ann Hum Biol. 2009; 36(6): 785-811. doi: 10.3109/03014460903198509. PMID: 19852679.
Pliss et al. 2006	Pliss L, Tambets K, Loogvali EL, Pronina N, Lazdins M, Krumina A, et al. Mitochondrial DNA portrait of Latvians: towards the understanding of the genetic structure of Baltic-speaking populations. Ann Hum Genet. 2006; 70(Pt 4): 439-58. doi: 10.1111/j.1469-1809.2005.00238.x. PMID: 16759178.
Poetsch et al. 2003	Poetsch M, Wittig H, Krause D, Lignitz E. Mitochondrial diversity of a northeast German population sample. Forensic Sci Int. 2003 ;137(2-3): 125-32. PMID: 14609647.
Prieto et al. 2011	Prieto L, Zimmermann B, Goios A, Rodriguez-Monge A, Paneto GG, Alves C, et al. The GHEP-EMPOP collaboration on mtDNA population data--A new resource for forensic casework. Forensic Sci Int Genet. 2011; 5(2): 146-51. doi: 10.1016/j.fsigen.2010.10.013. PMID: 21075696.
Pshenichnov et al. 2013	Pshenichnov A, Balanovsky O, Utevska O, Metspalu E, Zaporozhchenko V, Agdzhoyan A, et al. Genetic affinities of Ukrainians from the maternal perspective. Am J Phys Anthropol. 2013; 152(4): 543-50. doi: 10.1002/ajpa.22371. PMID: 24122717.
Quintana-Murci et al. 2004	Quintana-Murci L, Chaix R, Wells RS, Behar DM, Sayar H, Scozzari R, et al. Where west meets east: the complex mtDNA landscape of the southwest and Central Asian corridor. Am J Hum Genet. 2004; 74(5): 827-45. doi: 10.1086/383236. PMID: 15077202.
Rakha et al. 2011	Rakha A, Shin KJ, Yoon JA, Kim NY, Siddique MH, Yang IS, et al. Forensic and genetic characterization of mtDNA from Pathans of Pakistan. Int J Legal Med. 2011; 125(6):8 41-8. doi: 10.1007/s00414-010-0540-7. PMID: 21184092.
Richard et al. 2007	Richard C, Pennarun E, Kivisild T, Tambets K, Tolk HV, Metspalu E, et al. An mtDNA perspective of French genetic variation. Ann Hum Biol. 2007; 34(1): 68-79. PMID: 17536756.
Šarac et al. 2014	Sarac J, Saric T, Augustin DH, Jeran N, Kovacevic L, Cvjetan S, et al. Maternal genetic heritage of Southeastern Europe reveals a new Croatian isolate and a novel, local sub-branching in the x2 haplogroup. Ann Hum Genet. 2014; 78(3): 178-94. doi: 10.1111/ahg.12056. PMID: 24621318.
Serin et al. 2016	Serin A, Canan H, Alper B, Korkut Gulmen M, Zimmermann B, Parson W. Mitochondrial DNA control region haplotype and haplogroup diversity in South Eastern Turkey. Forensic Sci Int Genet. 2016; 24: 176-9. doi: 10.1016/j.fsigen.2016.07.011. PMID: 27479879.
Tillmar et al. 2010	Tillmar AO, Coble MD, Wallerstrom T, Holmlund G. Homogeneity in mitochondrial DNA control region sequences in Swedish subpopulations. Int J Legal Med. 2010; 124(2): 91-8. doi: 10.1007/s00414-009-0354-7. PMID: 19590886.
Turchi et al. 2008	Turchi C, Buscemi L, Previdere C, Grignani P, Brandstatter A, Achilli A, et al. Italian mitochondrial DNA database: results of a collaborative exercise and proficiency testing. Int J Legal Med. 2008; 122(3): 199-204. doi: 10.1007/s00414-007-0207-1. PMID: 17952451.
